# Supplementary material for: Pyridine- and pyrimidine-functionalized poly(sulfone)s: performance-enhancing crosslinkers for acid/base blend proton exchange membranes used in direct methanol fuel cells
Source: Royal Society of Chemistry journal article supplement (doi:10.1039/c3ra44851g), 2013-12-04
Supplement: c3ra44851g.pdf [file c3ra44851g.pdf]

## Supporting Information

### **Pyridine- and Pyrimidine-Functionalized Poly(sulfone)s: Performance-Enhancing Crosslinkers for Acid/Base Blend Proton Exchange Membranes for the Direct Methanol Fuel Cell**

*C. Daniel Varnado Jr.,<sup>a</sup> Xinsheng Zhao,<sup>b</sup> Michael Ortiz,<sup>a</sup> Zicheng Zuo,<sup>b</sup> Zhongqing Jiang,<sup>b</sup>  
Arumugam Manthiram<sup>b</sup> and Christopher W. Bielawski<sup>a\*</sup>*

<sup>a</sup>Department of Chemistry, The University of Texas at Austin, Austin, TX 78712

<sup>b</sup>Materials Science and Engineering Program, The University of Texas at Austin, Austin, TX 78712

E-mail: bielawski@cm.utexas.edu

#### **Table of Contents**

|                                                        |       |
|--------------------------------------------------------|-------|
| <b>Figure S1.</b> GPC traces                           | S2    |
| <b>Figure S2.</b> TGA data                             | S2    |
| <b>NMR Spectra</b>                                     |       |
| <sup>1</sup> H and <sup>13</sup> C NMR of <b>PMPS</b>  | S3–S4 |
| <sup>1</sup> H and <sup>13</sup> C NMR of <b>2-PPS</b> | S5–S6 |
| <sup>1</sup> H and <sup>13</sup> C NMR of <b>3-PPS</b> | S7–S8 |

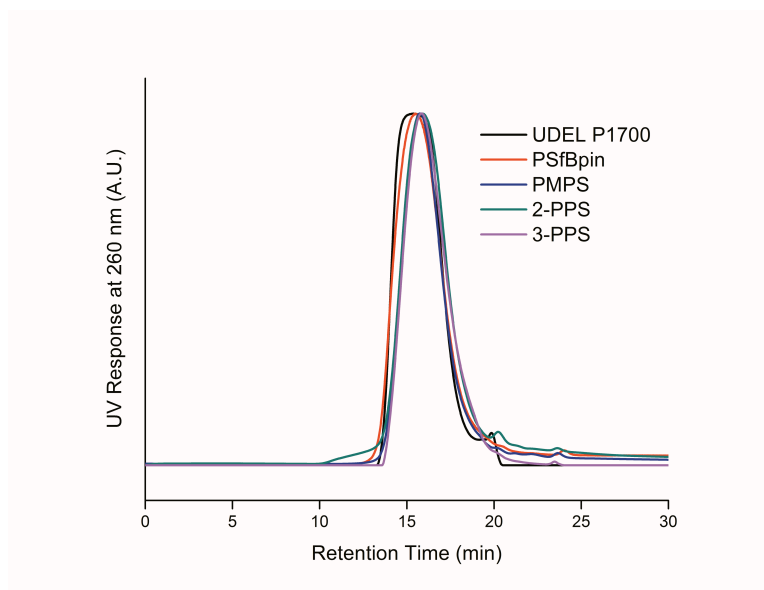

**Figure S1.** Gel permeation chromatograms of various polymers (eluent: THF, rate: 1.0 mL/min).

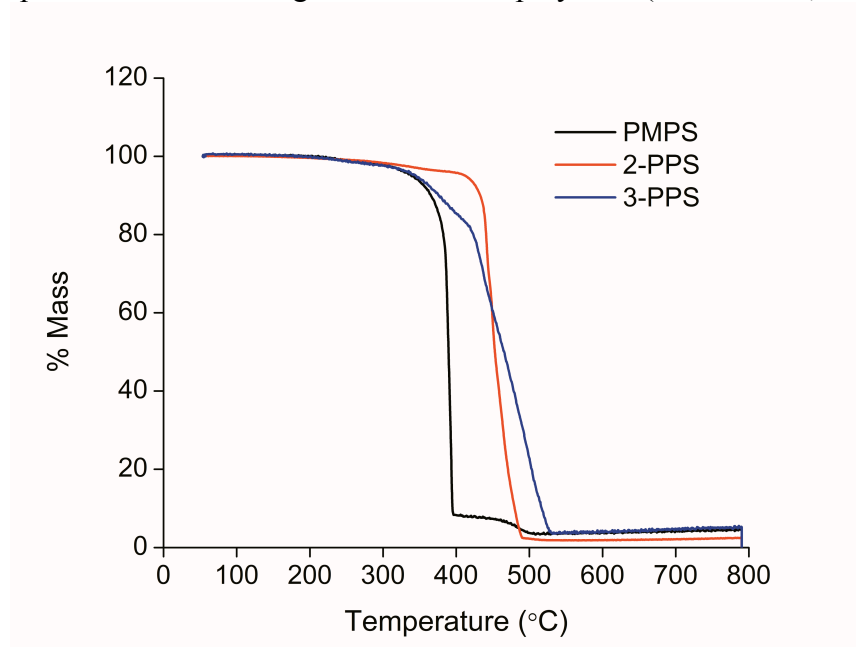

**Figure S2.** Thermogravigrams of various polymers under an atmosphere of oxygen (ramp rate = 20 °/min).

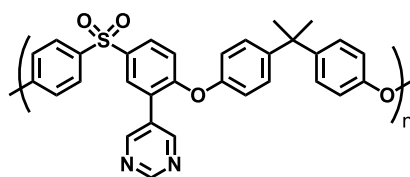

dv\_94\_pmps\_h1  
Archive directory:  
Sample directory:  
Pulse Sequence: s2pu1  
Solvent: cdc13  
Temp: 27.0 C / 300.1 K  
File: dv\_94\_pmps\_h1  
INOVA-500 "nmrelroy"  
Relax. delay 2.000 sec  
Pulse 90.0 degrees  
Acq. time 4.001 sec  
Width 7997.6 Hz  
64 repetitions  
OBSERVE H1, 499.8515093 MHz  
DATA PROCESSING  
Line broadening 0.1 Hz  
FT size 65536  
Total time 6 min, 36 sec

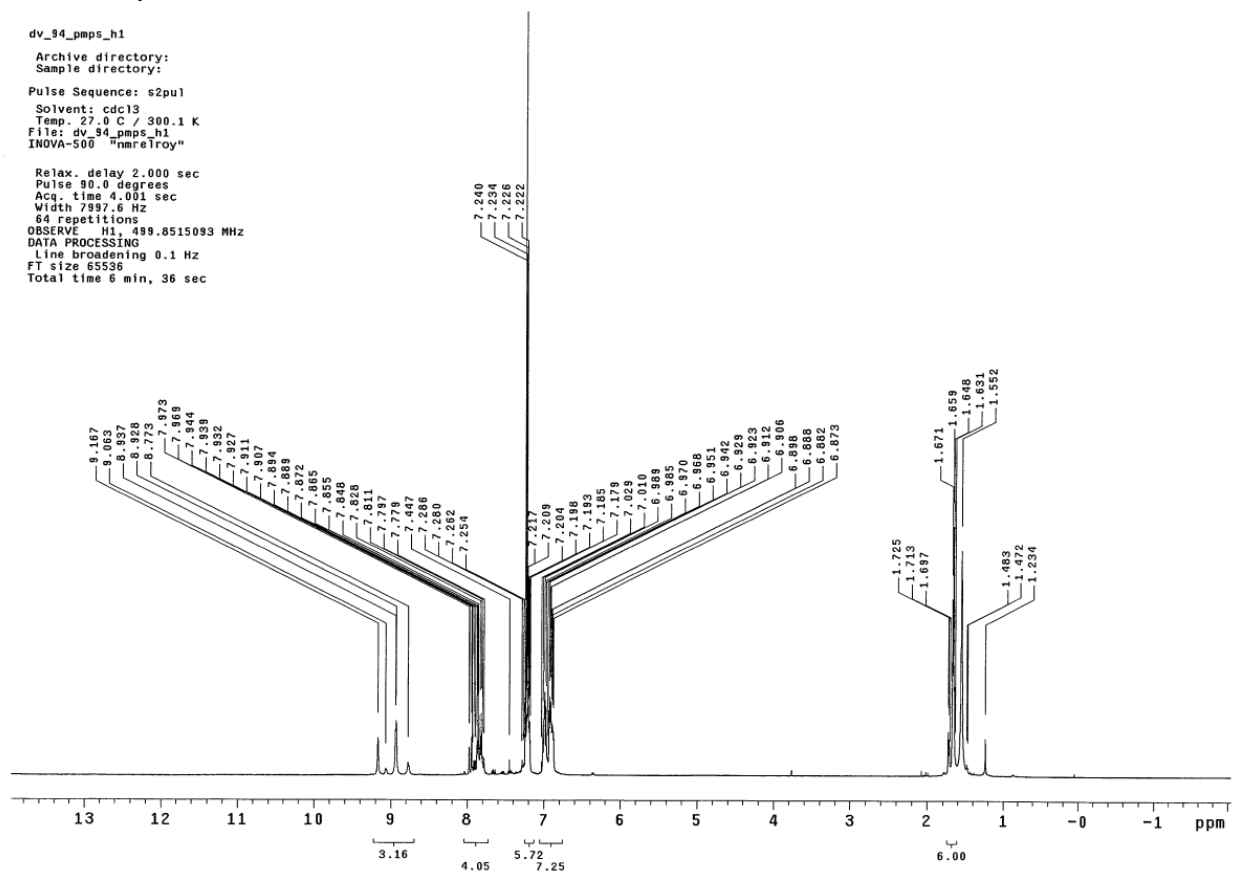

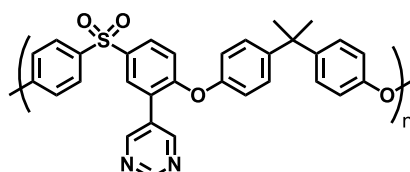

dv\_94\_pmps\_c13  
Archive directory:  
Sample directory:  
Pulse Sequence: s2pul  
Solvent: cdcl3  
Temp. 27.0 C / 300.1 K  
User: 1-14-87  
File: dv\_94\_pmps\_c13  
INOVA-500 "nmrelroy"  
  
Relax. delay 2.000 sec  
Pulse 90.0 degrees  
Acq. time 1.958 sec  
Width 30165.9 Hz  
58838 repetitions  
OBSERVE C13, 125.6877581 MHz  
DECOUPLE H1, 499.8539868 MHz  
Power 38 dB  
continuously on  
WALTZ-16 modulated  
DATA PROCESSING  
Line broadening 1.0 Hz  
FT size 131072  
Total time 66 hr, 7 min, 18 sec

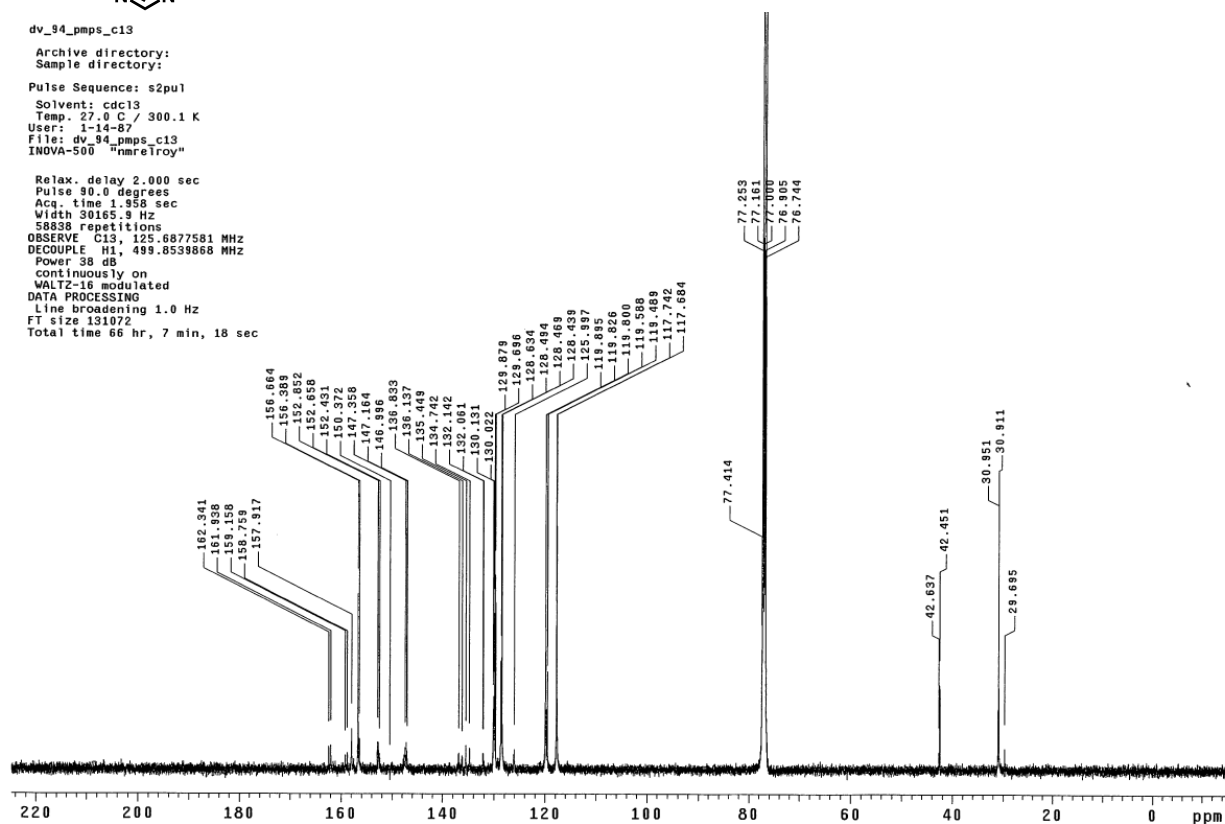

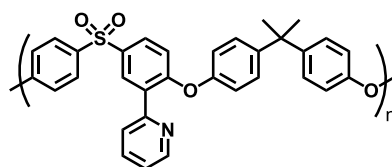

DV\_2PPS

Archive directory: /home/staff31/vmrsys/data  
Sample directory: DV\_2PPS\_20130821\_01

Pulse Sequence: s2pu1

Solvent: cdc13  
Temp: 25.0 C / 298.1 K  
File: PROTON\_01  
INNOVA-500 "nmrfred"

Relax. delay 2.000 sec  
Pulse 30.0 degrees  
Acq. time 2.556 sec  
Width 6410.3 Hz  
128 repetitions  
OBSERVE H1, 399.6757281 MHz  
DATA PROCESSING  
FT size 32768  
Total time 9 min, 44 sec

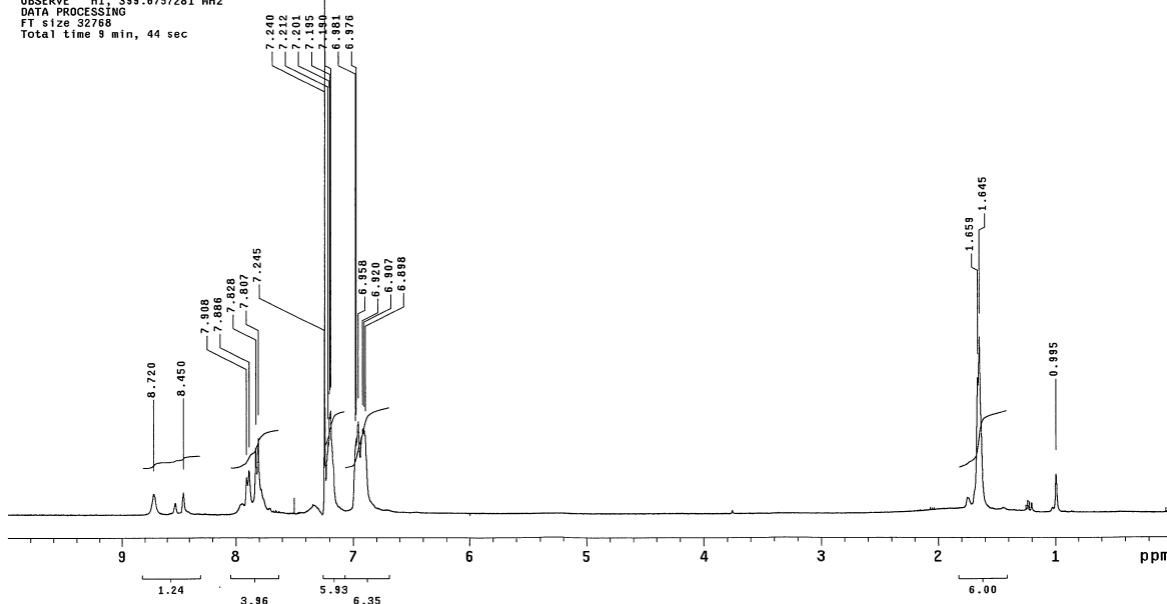

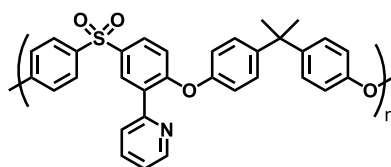

dv\_2pps\_a\_c13  
Archive directory:  
Sample directory:  
Pulse Sequence: s2pu1  
Solvent: cdc13  
Temp. 27.0 C / 300.1 K  
User: 1-14-87  
File: dv\_2pps\_a\_c13  
INOVA-500 "nmre1roy"  
Relax. delay 2.000 sec  
Pulse 90.0 degrees  
Acq. time 2.000 sec  
Width 32679.7 Hz  
57066 repetitions  
OBSERVE C13, 125.6877588 MHz  
DECOUPLE H1, 499.8539868 MHz  
Power 38 dB  
continuously on  
WALTZ-16 modulated  
DATA PROCESSING  
Line broadening 1.0 Hz  
FT size 131072  
Total time 56 hr, 48 min, 53 sec

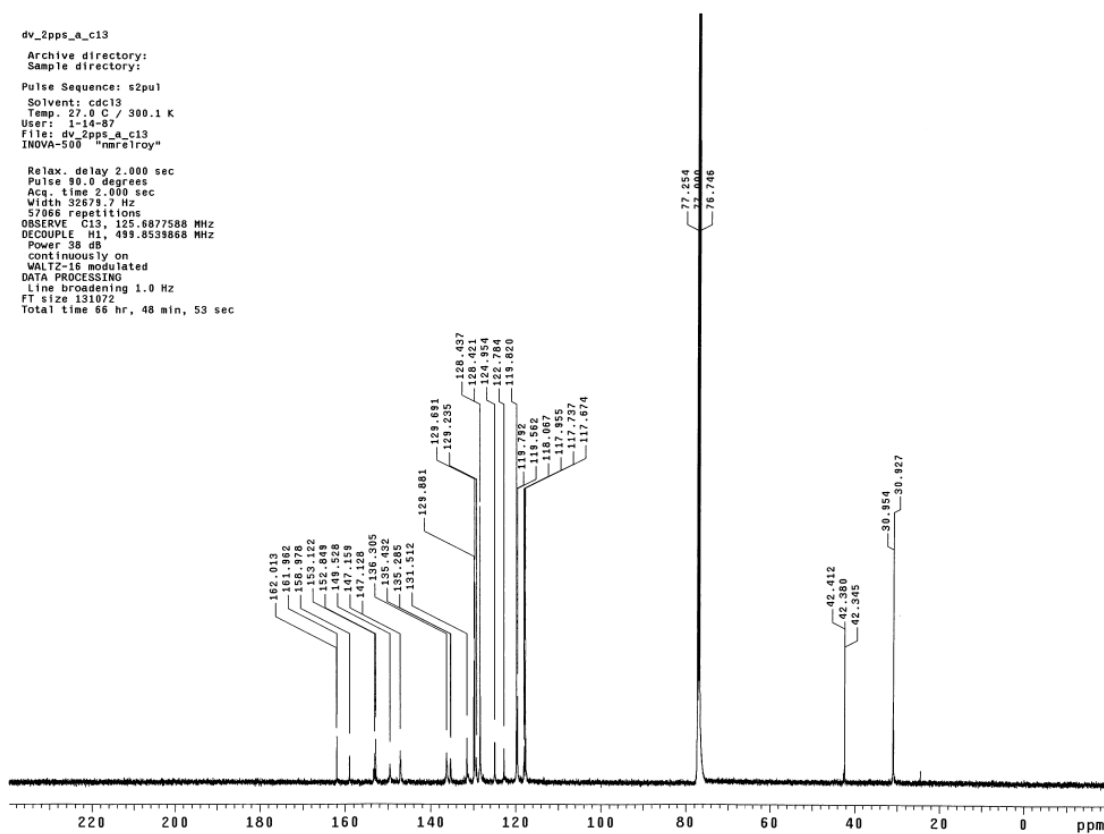

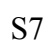

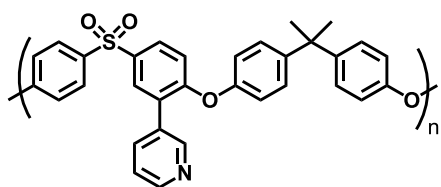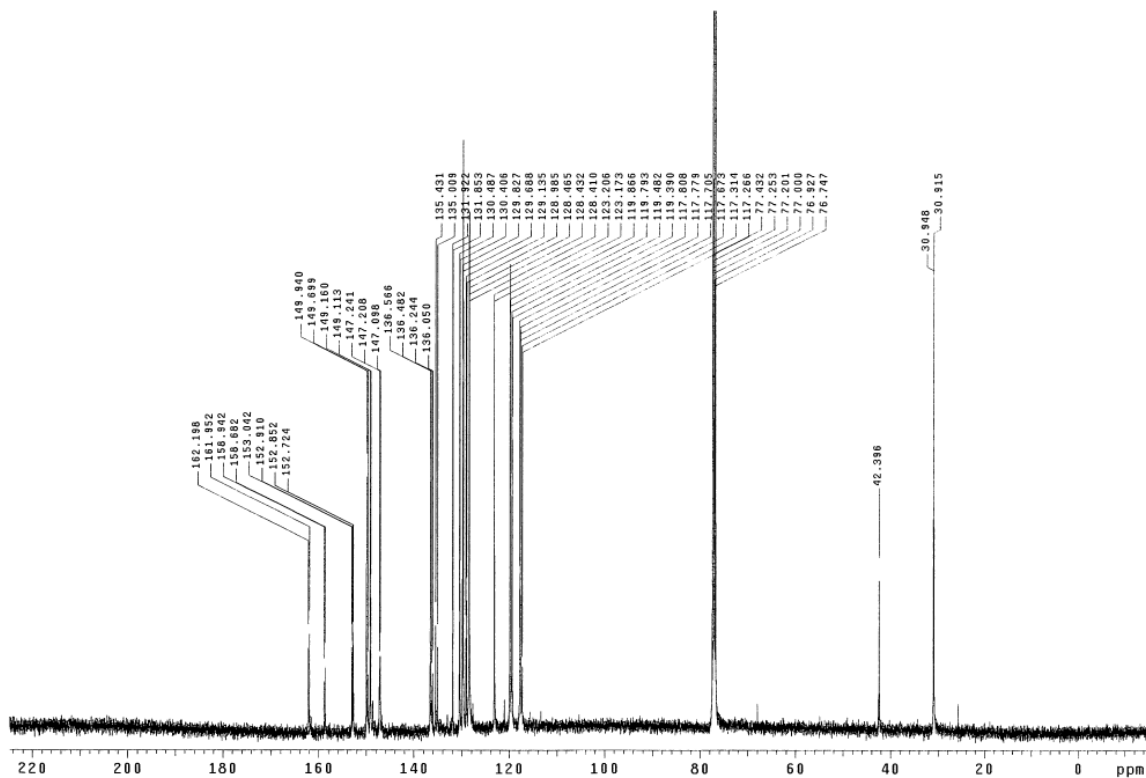

|                                                                                                                                       |                                                                                                                            |                                                                                             |                                                                                        |
|---------------------------------------------------------------------------------------------------------------------------------------|----------------------------------------------------------------------------------------------------------------------------|---------------------------------------------------------------------------------------------|----------------------------------------------------------------------------------------|
| <b>PULSE SEQUENCE</b><br>Relax. delay 2.000 sec<br>Pulse 90.0 degrees<br>Acq. time 1.956 sec<br>Width 30165.9 Hz<br>14000 repetitions | <b>OBSERVE</b> C13, 125.6877595<br><b>DECOUPLE</b> H1, 499.8539868<br>Power 38 dB<br>continuously on<br>WALTZ-16 modulated | <b>DATA PROCESSING</b><br>Line broadening 1.0 Hz<br>FT size 131072<br>Total time 15.4 hours | dv_psfpy_c13<br><br>Archive directory:<br>Sample directory:<br>201408270900259:ab60v1k |
|---------------------------------------------------------------------------------------------------------------------------------------|----------------------------------------------------------------------------------------------------------------------------|---------------------------------------------------------------------------------------------|----------------------------------------------------------------------------------------|
